# Supplementary material for: Cognition and behavior in adults with neurofibromatosis type 1
Source: PubMed Central journal article supplement (PMC11638057; doi:10.3389/fneur.2024.1476472), 2024-11-29
Supplement: Data_Sheet_1.pdf [file Data_Sheet_1.pdf]

Supplementary Figure 1. Overview of cognitive and behavioral domains and instruments administered

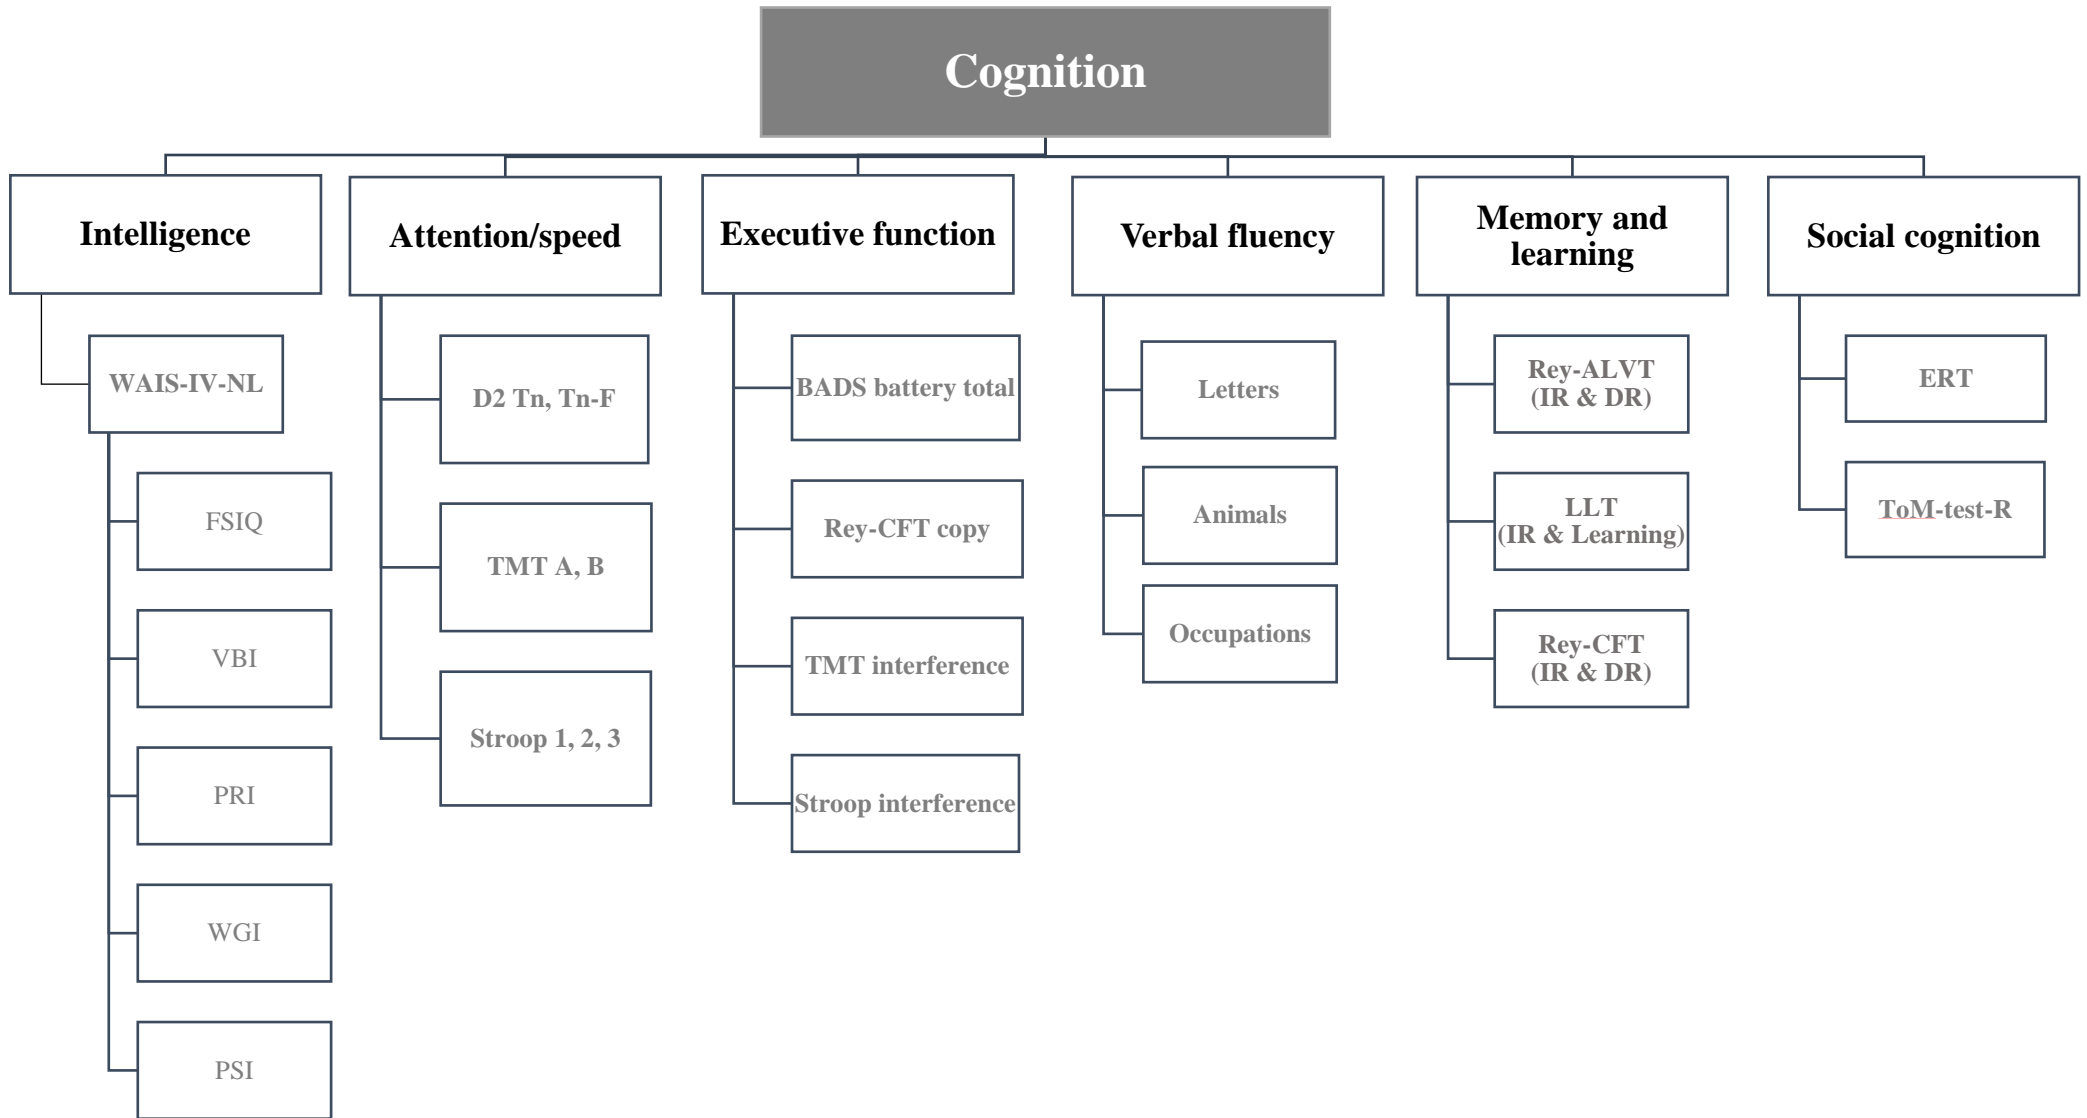

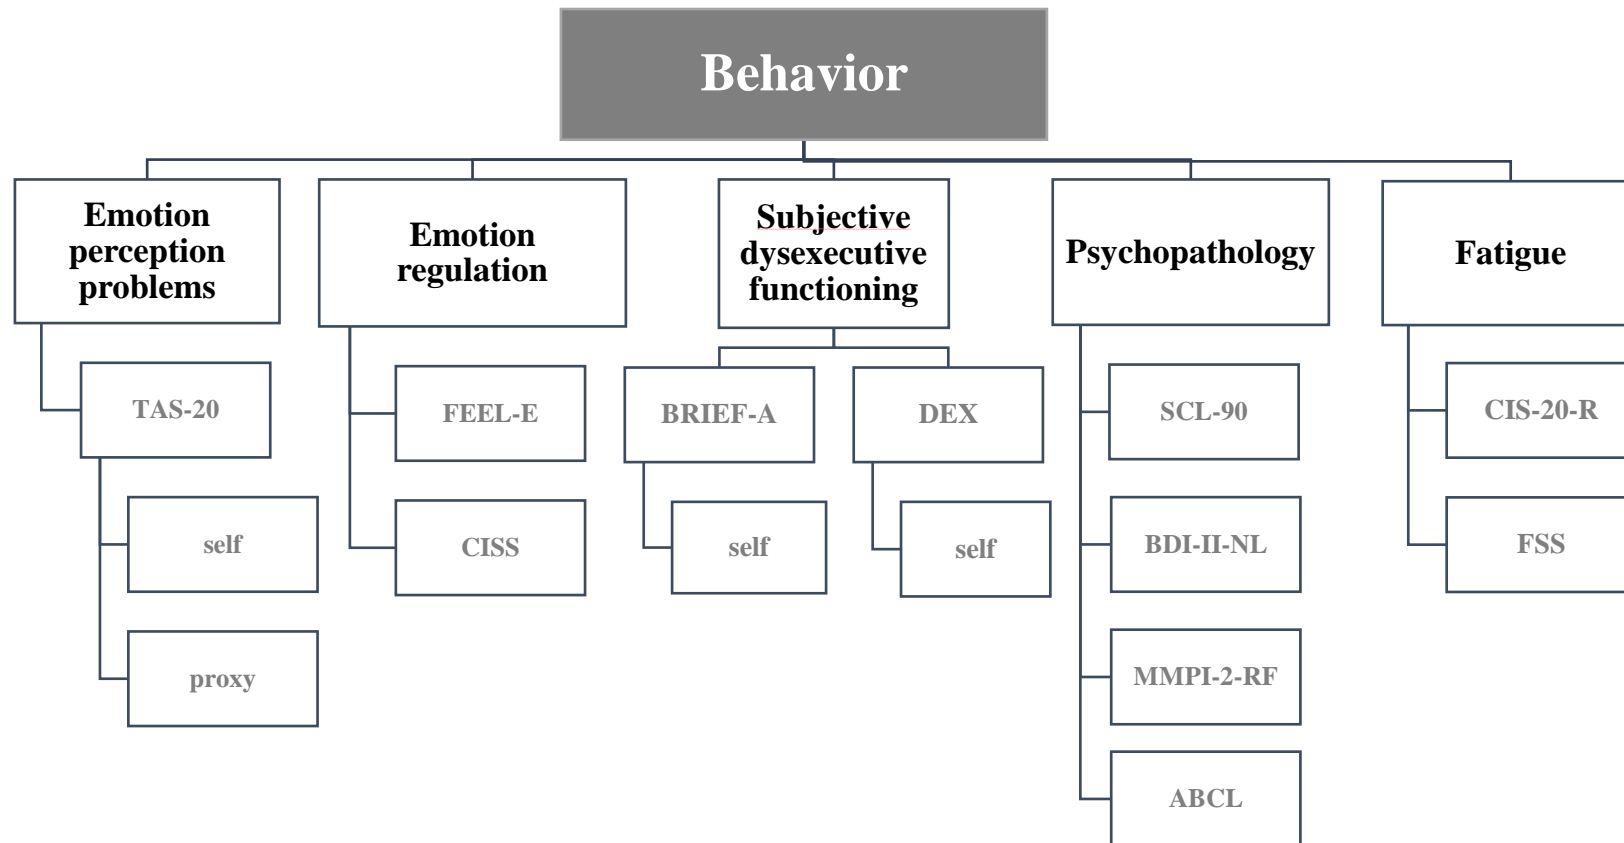

**Supplementary Figure 1.**

*Abbreviations:* WAIS-IV-NL: Wechsler Adult Intelligence Scale-IV-NL; FSIQ: full scale intelligence quotient; VBI: verbal comprehension index; PRI: perceptual reasoning index; WGI: working memory index; PSI: processing speed index; D2: D2 Test of Attention; TMT: Trail Making Test; Stroop: Stroop Color and Word Test trials 1,2, and 3; Rey-CFT; Rey-Osterrieth Complex Figure Test; BADS: Behavioural Assessment of the Dysexecutive Syndrome; Rey-ALVT: Rey Auditory Verbal Learning Test; IR: Immediate Recall; DR: Delayed Recall; LLT: Location Learning Test; ERT: Emotion Recognition Task; ToM-test-R: Theory-of-Mind test Revised. TAS-20: Toronto Alexithymia Scale-20; FEEL-E: Fragebogen zur Erhebung der Emotionsregulation bei Erwachsenen (Questionnaire for the survey of emotion regulation in adults); CISS: Coping Inventory for Stressful Situations; BRIEF-A: Behaviour Rating Inventory of Executive Function- Adult Version; DEX: Dysexecutive Questionnaire; SCL-90: Symptom Checklist-90-R; BDI-II: Beck Depression Inventory-II; MMPI 2-RF: Minnesota Multiphasic Personality Inventory-2 Restructured Form; ABCL: Adult Behaviour Checklist; FSS: Fatigue Severity Scale; CIS-20-R: Checklist Individual Strength-20-Revised.

**Supplementary Table 1. Overview of neuropsychological instruments, abbreviations, and references**

| Neuropsychological instrument                                                   | Abbreviation | Reference                                                                                                                                                                                                                                                                                                                                                                                                                                                                                                                                                                                                                                                                |
|---------------------------------------------------------------------------------|--------------|--------------------------------------------------------------------------------------------------------------------------------------------------------------------------------------------------------------------------------------------------------------------------------------------------------------------------------------------------------------------------------------------------------------------------------------------------------------------------------------------------------------------------------------------------------------------------------------------------------------------------------------------------------------------------|
| Amsterdamse Korte Termijn Geheugen Test ( <i>Dutch short-term memory test</i> ) | AKTG         | Schmand, B., De Sterke, S., & Lindeboom, J. (1998). <i>AKTG : Amsterdamse korte termijn geheugen test</i> . Lisse: Swets Test Publishers.<br>Cut-off point: $\leq 84$                                                                                                                                                                                                                                                                                                                                                                                                                                                                                                    |
| Test of Memory Malingering                                                      | TOMM         | Tombaugh, T. N. (1996). <i>Test of Memory Malingering (TOMM)</i> . New York: MHS.<br>Tombaugh, T. N. (2013). <i>Test of memory malingering TOMM; user's manual</i> . New York: MHS.<br>Cut-off points: trial 1 < 18; trial 2 < 45                                                                                                                                                                                                                                                                                                                                                                                                                                        |
| Visual Association Test – Extended                                              | VAT-E        | Meyer, S. R. A., & De Jonghe, J. F. M. (2019). <i>Visuele associatietest – Extended: Handleiding</i> . Amsterdam: Hogrefe Uitgevers BV.<br>Meyer, S. R. A., De Jonghe, J. F. M., Schmand, B., & Ponds, R. W. H. M. (2017). The Visual Association Test – Extended: A cross-sectional study of the performance validity measures. <i>The Clinical Neuropsychologist</i> , 31(4), 798-813. <a href="https://doi.org/10.1080/13854046.2017.1280181">https://doi.org/10.1080/13854046.2017.1280181</a><br>Cut-off points: $\leq 21$ immediate recognition; $\leq 20$ delayed recognition; $\leq 21$ consistency; $\geq 7$ free recall combined with $\leq 9$ multiple choice |
| Wechsler Adult Intelligence Scale IV-NL                                         | WAIS-IV-NL   | Wechsler, D. (2012). <i>Wechsler Adult Intelligence Scale – Fourth Edition, Nederlandstalige bewerking (WAIS-IV-NL): Technische handleiding (WAIS-IV Dutch version: Technical manual)</i> . Amsterdam: Pearson.                                                                                                                                                                                                                                                                                                                                                                                                                                                          |
| Rey Auditory Verbal Learning Test ( <i>Dutch translation: 15-Woorden Test</i> ) | AVLT         | Rey, A. (1964). <i>Rey auditory verbal learning test (RAVLT)</i> . L'Examen clinique en psychologie [ <i>Clinical tests in psychology</i> ]. Paris: Presses Universitaires de France (PUF).<br>Bouma, A., Mulder, J., Lindeboom, J. & Schmand, B. (2012). <i>Handboek Neuropsychologische Diagnostiek (tweede herziene druk) [Handbook neuropsychological assessment]</i> . Amsterdam: Pearson.                                                                                                                                                                                                                                                                          |
| Rey-Osterrieth Complex Figure Test                                              | Rey CFT      | Lezak, M. D., Howieson, D. B., Bigler, E. D., & Tranel, D. (2012). <i>Neuropsychological Assessment (5<sup>th</sup> ed)</i> . New York: Oxford University Press.<br>Bouma, A., Mulder, J., Lindeboom, J., & Schmand, B. (2012). <i>Handboek Neuropsychologische Diagnostiek (tweede herziene druk)</i> . Amsterdam: Pearson Assessment and Information B.V.                                                                                                                                                                                                                                                                                                              |
| Location Learning Test                                                          | LLT          | Kessels, R. P. C., Bucks, R. S., Willison, J. R., & Byrne, L. M. T. (2012). <i>Location Learning Test Herziene Uitgave – Handleiding [LLT Manual]</i> . Amsterdam: Hogrefe.                                                                                                                                                                                                                                                                                                                                                                                                                                                                                              |
| Verbal Fluency                                                                  | Fluency      | Luteijn, F., & Barelids, D. P. F. (2004). <i>Groninger Intelligentie Test 2 Handleiding</i> . Amsterdam: Harcourt Assessment B.V.<br>Schmand, B., Houx, P., & De Koning, I. (2012). <i>Normen voor Psychologische Tests voor gebruik in de Klinische Neuropsychologie</i> . Sectie Neuropsychologie, Nederlands Instituut voor Psychologen (NIP).                                                                                                                                                                                                                                                                                                                        |
| Behavioural Assessment of the Dysexecutive Syndrome                             | BADS         | Wilson, B. A., Alderman, N., Burgess, P.W., Emslie, H., & Evans, J. J. (1996). <i>BADS: Behavioural Assessment of the Dysexecutive Syndrome</i> . London: Pearson.<br>Krabbendam, L., & Kalf, A. C. (1997). <i>BADS-NL. Handleiding [BADS-NL Manual]</i> . Lisse: Swets & Zeitlinger.                                                                                                                                                                                                                                                                                                                                                                                    |

|                                                              |            |                                                                                                                                                                                                                                                                                                                                                                                                                                                                                                                                  |
|--------------------------------------------------------------|------------|----------------------------------------------------------------------------------------------------------------------------------------------------------------------------------------------------------------------------------------------------------------------------------------------------------------------------------------------------------------------------------------------------------------------------------------------------------------------------------------------------------------------------------|
| Behavior Rating Inventory of Executive Function, Adult       | BRIEF-A    | Gioia, G., Isquith, P. K., Guy, S. C., & Kenworthy, L. (2004). <i>Behavior Rating Inventory of Executive Function (BRIEF): Professional manual</i> . Lutz, FL: Psychological Assessment Resources. [Dutch translation: Scholte, E., & Noens, I. (2011). <i>Vragenlijst over executieve functies bij volwassenen (BRIEF-A). Handleiding</i> ]. Amsterdam: Hogrefe.                                                                                                                                                                |
| Dysexecutive Questionnaire                                   | DEX        | Krabbendam, L., & Kalf, A. C. (1997). <i>BADS Behavioural Assessment of the Dysexecutive Syndrome Handleiding</i> . Lisse: Swets & Zeitlinger.                                                                                                                                                                                                                                                                                                                                                                                   |
| d2 Test of Attention                                         | d2         | Brickenkamp, R., & Oosterveld, P. (2014). <i>d2 Aandachts- en concentratietest. Handleiding [Test of Attention. Manual]</i> . Amsterdam: Hogrefe.                                                                                                                                                                                                                                                                                                                                                                                |
| Stroop Color and Word Test                                   | Stroop     | Bouma, A., Mulder, J., Lindeboom, J., & Schmand, B. (2012). <i>Handboek Neuropsychologische Diagnostiek (tweede herziene druk)</i> . Amsterdam: Pearson Assessment and Information B.V.<br>Schmand, B., Houx, P., & De Koning, I. (2012). <i>Normen voor Psychologische Tests voor gebruik in de Klinische Neuropsychologie</i> . Sectie Neuropsychologie, Nederlands Instituut voor Psychologen (NIP).                                                                                                                          |
| Trail Making Test                                            | TMT        | Lezak, M. D., Howieson, D. B., Bigler, E. D., & Tranel, D. (2012). <i>Neuropsychological Assessment (5<sup>th</sup> ed.)</i> . New York: Oxford University Press.<br>Schmand, B., Houx, P., & De Koning, I. (2012). <i>Normen voor Psychologische Tests voor gebruik in de Klinische Neuropsychologie</i> . Sectie Neuropsychologie, Nederlands Instituut voor Psychologen (NIP).                                                                                                                                                |
| Emotion Recognition Task                                     | ERT        | Kessels, R. P. C., Montagne, B., Hendriks, A. W., Perrett, D. I., & De Haan, E. H. F. (2014). Assessment of perception of morphed facial expressions using the Emotion Recognition Task (ERT): Normative data from healthy participants aged 8-75. <i>Journal of Neuropsychology</i> , 8(1), 75-93. <a href="https://doi.org/10.1111/jnp.12009">https://doi.org/10.1111/jnp.12009</a>                                                                                                                                            |
| Theory-of-Mind test Revised                                  | ToM-test-R | Steenman, P., & Meesters, C. (2009), <i>ToM test-R: Handleiding</i> . Antwerpen/Apeldoorn: Garant.                                                                                                                                                                                                                                                                                                                                                                                                                               |
| Toronto Alexithymia Scale-20                                 | TAS-20     | Kooiman, C. G., Spinhoven, P., & Trijsburg, R. W. (2002). The assessment of alexithymia: A critical review of the literature and a psychometric study of the Toronto Alexithymia Scale-20. <i>Journal of Psychosomatic Research</i> , 53(6), 1083-1090. <a href="https://doi.org/10.1016/S0022-3999(02)00348-3">https://doi.org/10.1016/S0022-3999(02)00348-3</a>                                                                                                                                                                |
| Coping Inventory for Stressful Situations                    | CISS       | Endler, N. S., & Parker, J. D. A. (1999). <i>Coping Inventory for Stressful Situations (CISS): Manual</i> . MHS: Toronto. [Dutch translation: De Ridder, D. T. D., & Van Heck, G. L. (2004). <i>CISS-NL. Handleiding</i> ]. Amsterdam: Pearson.                                                                                                                                                                                                                                                                                  |
| Questionnaire for the survey of emotion regulation in adults | FEEL-E     | Grob, A., & Horowitz, D. (2014). <i>FEEL-E. Fragebogen zur Erhebung der Emotionsregulation bei Erwachsenen</i> . Bern: Verlag Hans Huber. [Dutch translation: Punt, D. J. (2014). <i>Vragenlijst over emotieregulatie bij volwassenen. FEEL-E.</i> ] Amsterdam: Hogrefe.                                                                                                                                                                                                                                                         |
| Adult Behavior Checklist                                     | ABCL       | Achenbach, T. M. & Rescorla, L. A. (2003). <i>Manual for the ASEBA Adult Forms &amp; Profiles</i> . Burlington, VT: University of Vermont, Research Center for Children, Youth, & Families.                                                                                                                                                                                                                                                                                                                                      |
| Checklist Individual Strength-20-Revised                     | CIS-20-R   | Vercoulen, J. H. M. M., Alberts, M., & Bleijenbergh, G. (1999). Kort instrumenteel: de Checklist Individual Strength (CIS). <i>Gedragstherapie</i> , 32(2), 131-136.<br>Vercoulen, J. H. M. M., Swanink, C. M. A., Fennis, J. F. M., Galama, J. M. D., van der Meer, J. W. M., & Bleijenbergh, G. (1994). Dimensional assessment of chronic fatigue syndrome. <i>Journal of Psychosomatic Research</i> , 38(5), 383-392. <a href="https://doi.org/10.1016/0022-3999(94)90099-X">https://doi.org/10.1016/0022-3999(94)90099-X</a> |
| Fatigue Severity Scale                                       | FSS        | Krupp, L. B., LaRocca, N. G., Muir-Nash, J., & Steinberg A. D. (1989). The Fatigue Severity Scale: application to patients with multiple sclerosis and systemic lupus erythematosus. <i>Archives of Neurology</i> ,                                                                                                                                                                                                                                                                                                              |

|                                                                 |           |                                                                                                                                                                                                                                                                                                                                                                                                                                                                                                                                                                                                                                                         |
|-----------------------------------------------------------------|-----------|---------------------------------------------------------------------------------------------------------------------------------------------------------------------------------------------------------------------------------------------------------------------------------------------------------------------------------------------------------------------------------------------------------------------------------------------------------------------------------------------------------------------------------------------------------------------------------------------------------------------------------------------------------|
|                                                                 |           | 46(10), 1121-1123.<br>Dutch translation: Rietberg, M. B., van Wegen, E. E. H., & Kwakkel, G. (2010). Measuring fatigue in patients with multiple sclerosis: reproducibility, responsiveness and concurrent validity of three Dutch self-report questionnaires. <i>Disability and rehabilitation</i> , 32(22), 1870-1876.<br><a href="https://doi.org/10.3109/09638281003734458">https://doi.org/10.3109/09638281003734458</a><br>Retrieved from: <a href="https://meetinstrumentenzorg.nl/instrumenten/fatigue-severity-scale/">https://meetinstrumentenzorg.nl/instrumenten/fatigue-severity-scale/</a> [2022, November 14].                           |
| Minnesota Multiphasic Personality Inventory-2 Restructured Form | MMPI-2-RF | Ben-Porath, Y. S., & Tellegen, A. (2008). <i>MMPI-2-RF manual for administration, scoring, and interpretation</i> . Minneapolis, MN: University of Minnesota Press.<br>Van Der Heijden, P., Derksen, J., Egger, J., Rossi, G., Laheij, M., & Bögels, T. (2013). <i>MMPI-2-RF. Minnesota Multiphasic Personality Inventory-2 Restructured Form. Handleiding voor Afname, scoring en interpretatie [Manual for administration, scoring and interpretation: Dutch-Flemish translation]</i> . Nijmegen: PEN Tests Publisher.                                                                                                                                |
| Beck Depression Inventory-II                                    | BDI-II-NL | Beck, A. T., Steer, R. A., & Brown, G. K. (1996). <i>Manual for the Beck depression inventory-II</i> . San Antonio, TX: Psychological Corporation. Van Der Does, A. J. W. (2002). <i>BDI-II Dutch translation. Handleiding [BDI-II-NL Manual]</i> . The Netherlands, Pearson.<br>Roelofs, J., van Breukelen, G., de Graaf, L. E., Beck, A. T., Arntz, A., & Huibers, M. J. H. (2013). Norms for the Beck Depression Inventory (BDI-II) in a large Dutch community sample. <i>Journal of Psychopathology and Behavioral Assessment</i> , 35(1), 93–98. <a href="https://doi.org/10.1007/s10862-012-9309-2">https://doi.org/10.1007/s10862-012-9309-2</a> |
| Symptom Checklist-90 Revised                                    | SCL-90-R  | Arrindell, W. A., & Ettema, J. H. M. (1986; 2003). <i>Handleiding bij een multidimensionele psychopathologie-indicator [SCL-90-R. Manual of a multi-dimensional psychopathology indicator]</i> . Amsterdam: Pearson.                                                                                                                                                                                                                                                                                                                                                                                                                                    |
